# Supplementary material for: Comprehensive analyses of immunodynamics and immunoreactivity in response to treatment in ALK-positive non-small-cell lung cancer
Source: PubMed Central journal article supplement — J Immunother Cancer. 2020 Jul 29;8(2):e000970. doi: 10.1136/jitc-2020-000970 (PMC7394300; doi:10.1136/jitc-2020-000970), 2020-07-29
Supplement: jitc-2020-000970supp003.pdf [file jitc-2020-000970supp003.pdf]

# Supplementary Figure 3

**A**

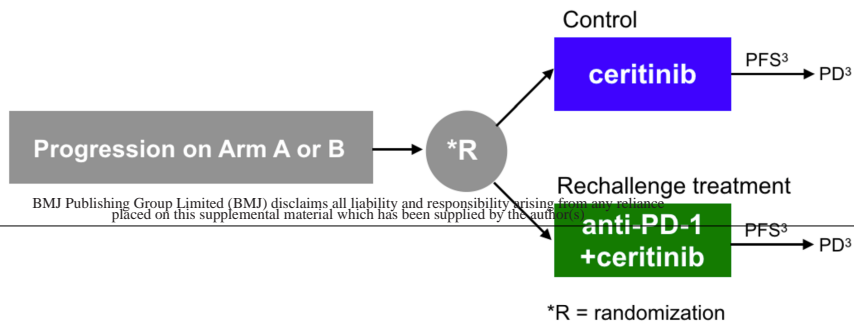

Supplemental material

BMJ Publishing Group Limited (BMJ) disclaims all liability and responsibility arising from any reliance placed on this supplemental material which has been supplied by the author(s)

*J Immunother Cancer*

**B**

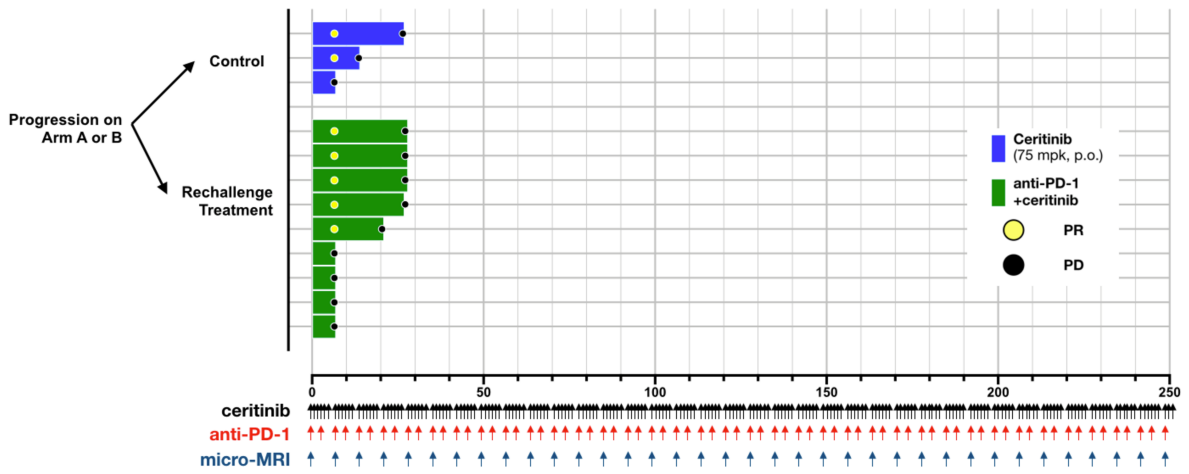

**C**

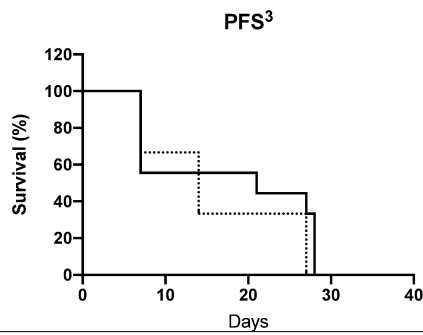

Pyo K-H, et al. *J Immunother Cancer* 2020; 8:e000970. doi: 10.1136/jitc-2020-000970
