# Supplementary material for: Comprehensive analyses of immunodynamics and immunoreactivity in response to treatment in ALK-positive non-small-cell lung cancer
Source: PubMed Central journal article supplement — J Immunother Cancer. 2020 Jul 29;8(2):e000970. doi: 10.1136/jitc-2020-000970 (PMC7394300; doi:10.1136/jitc-2020-000970), 2020-07-29

## Supplementary Figure 9

Down-regulated genes  
in progression of ceritinib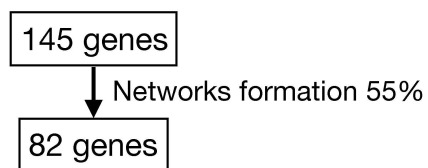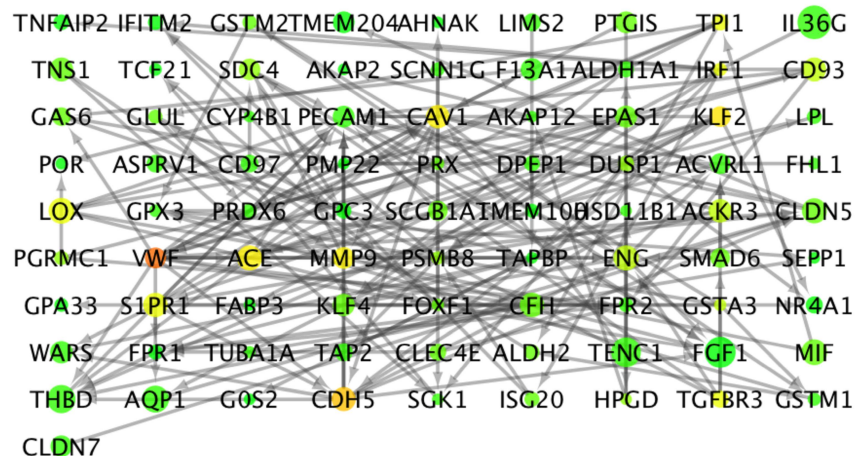

Number of nodes = 82  
Number of edges = 165  
Edges/nodes ratio = 2.01  
Clustering coefficient = 0.122  
Average number of neighbors = 4.024

Node Size Mapping

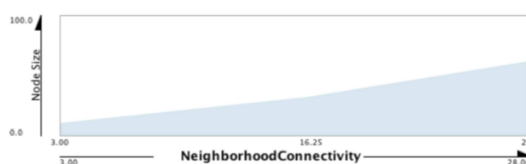Up-regulated genes  
in progression of ceritinib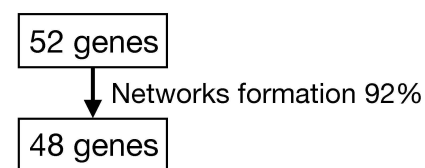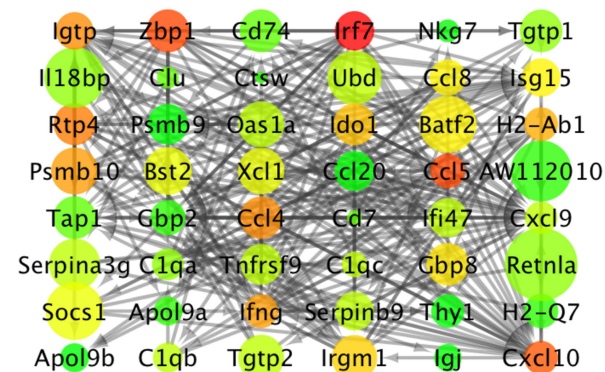

Number of nodes = 48  
Number of edges = 258  
Edges/nodes ratio = 5.37  
Clustering coefficient = 0.305  
Average number of neighbors = 10.75

Node Fill Color Mapping

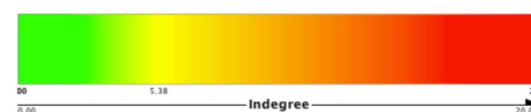

Supplement: jitc-2020-000970supp009.pdf [file jitc-2020-000970supp009.pdf]
