# Supplementary figures and images for: Comprehensive analyses of immunodynamics and immunoreactivity in response to treatment in ALK-positive non-small-cell lung cancer
Source: PubMed Central journal article supplement — J Immunother Cancer. 2020 Jul 29;8(2):e000970. doi: 10.1136/jitc-2020-000970 (PMC7394300; doi:10.1136/jitc-2020-000970), 2020-07-29

## Supplementary Figure 1

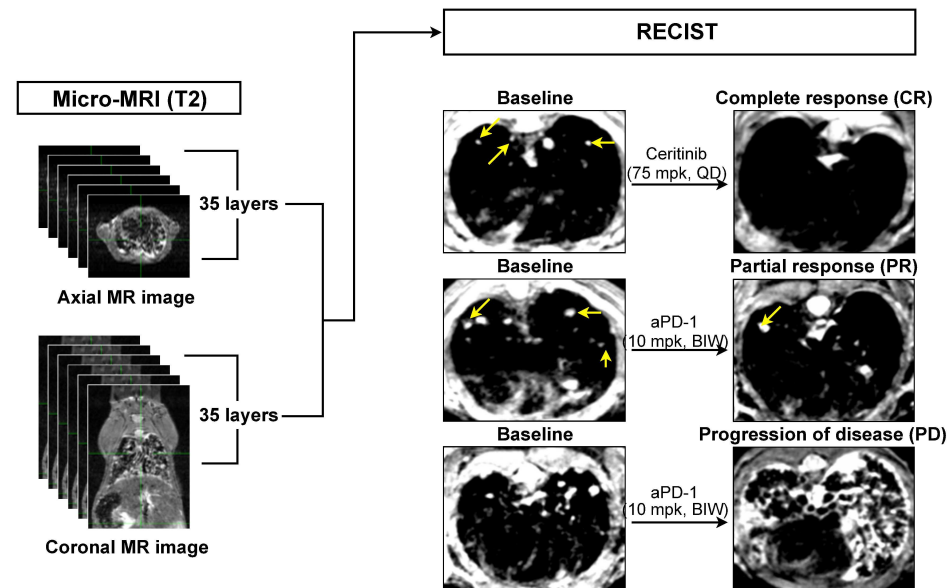

Supplement: jitc-2020-000970supp001.pdf [file jitc-2020-000970supp001.pdf]

## Supplementary Figure 2

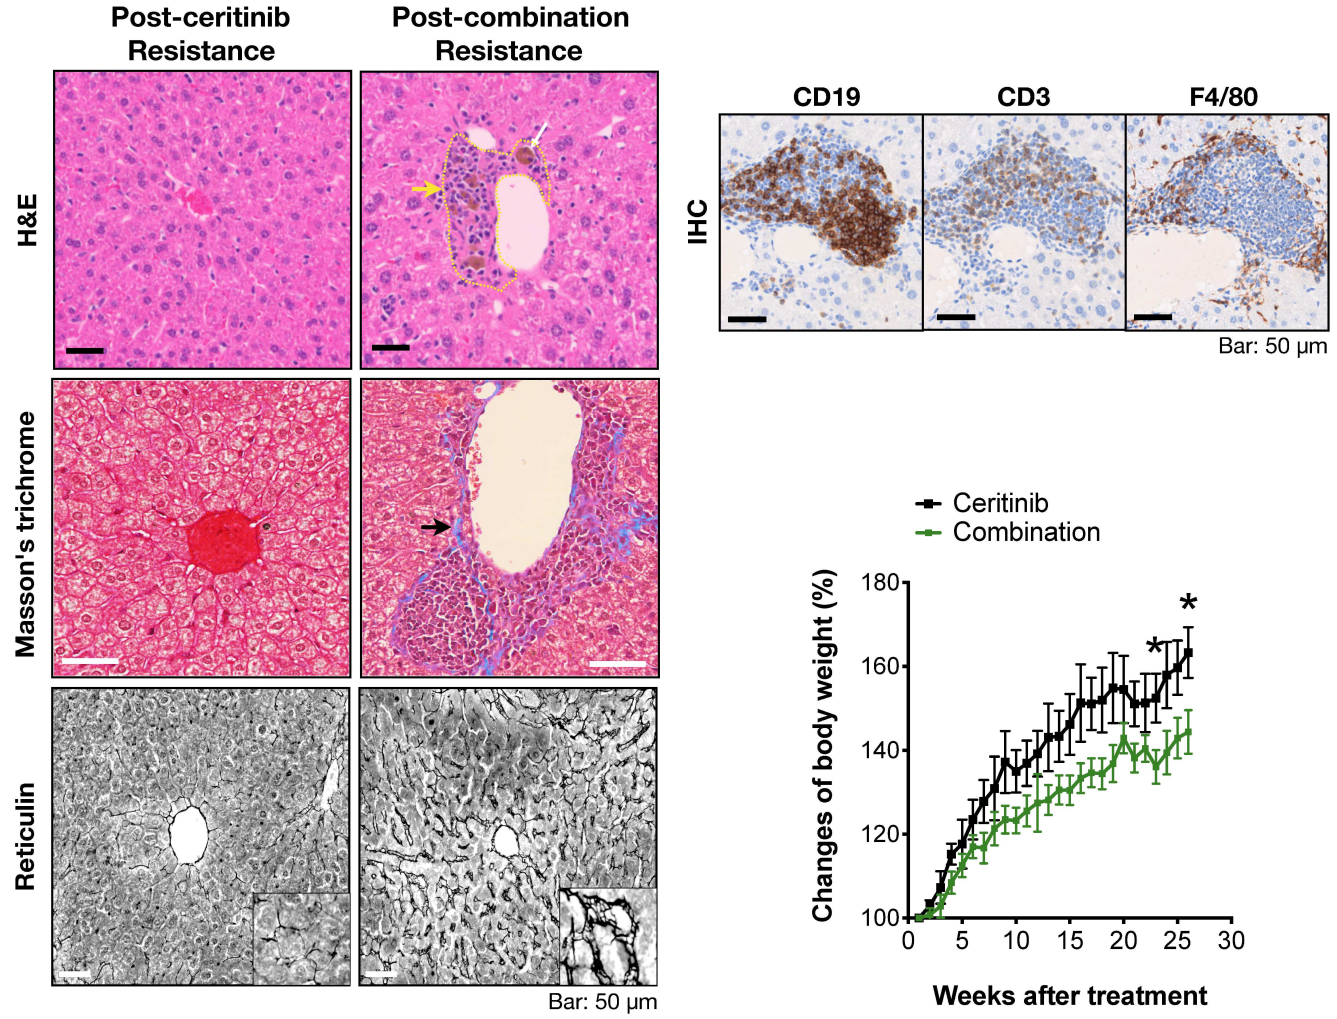

Supplement: jitc-2020-000970supp002.pdf [file jitc-2020-000970supp002.pdf]

## Supplementary Figure 4

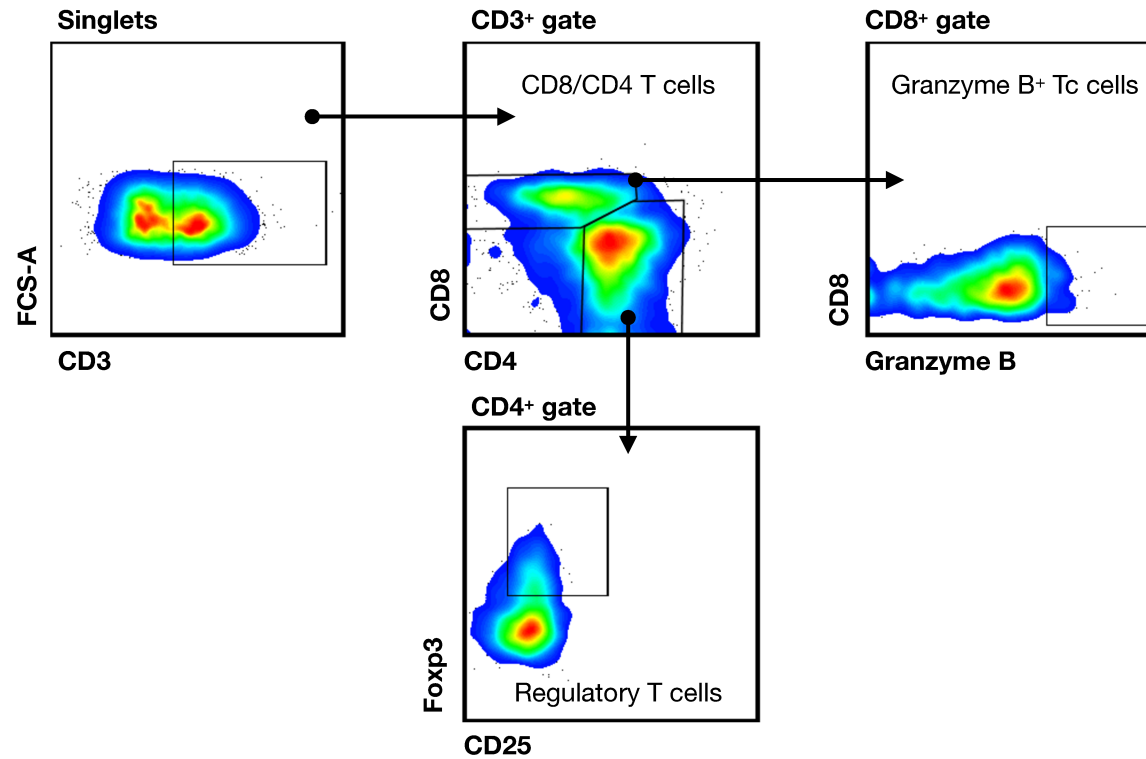

Supplement: jitc-2020-000970supp004.pdf [file jitc-2020-000970supp004.pdf]

## Supplementary Figure 5

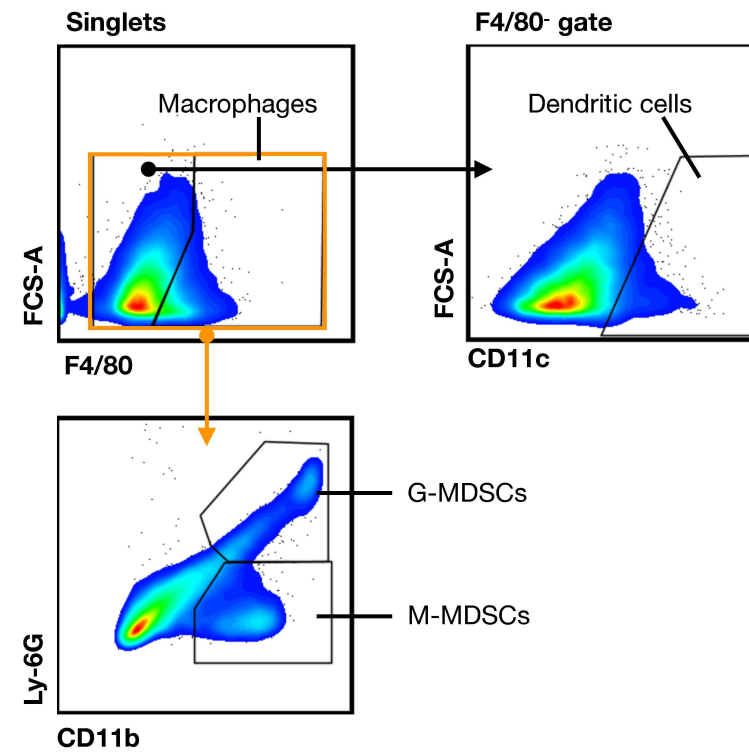

Supplement: jitc-2020-000970supp005.pdf [file jitc-2020-000970supp005.pdf]

## Supplementary Figure 6

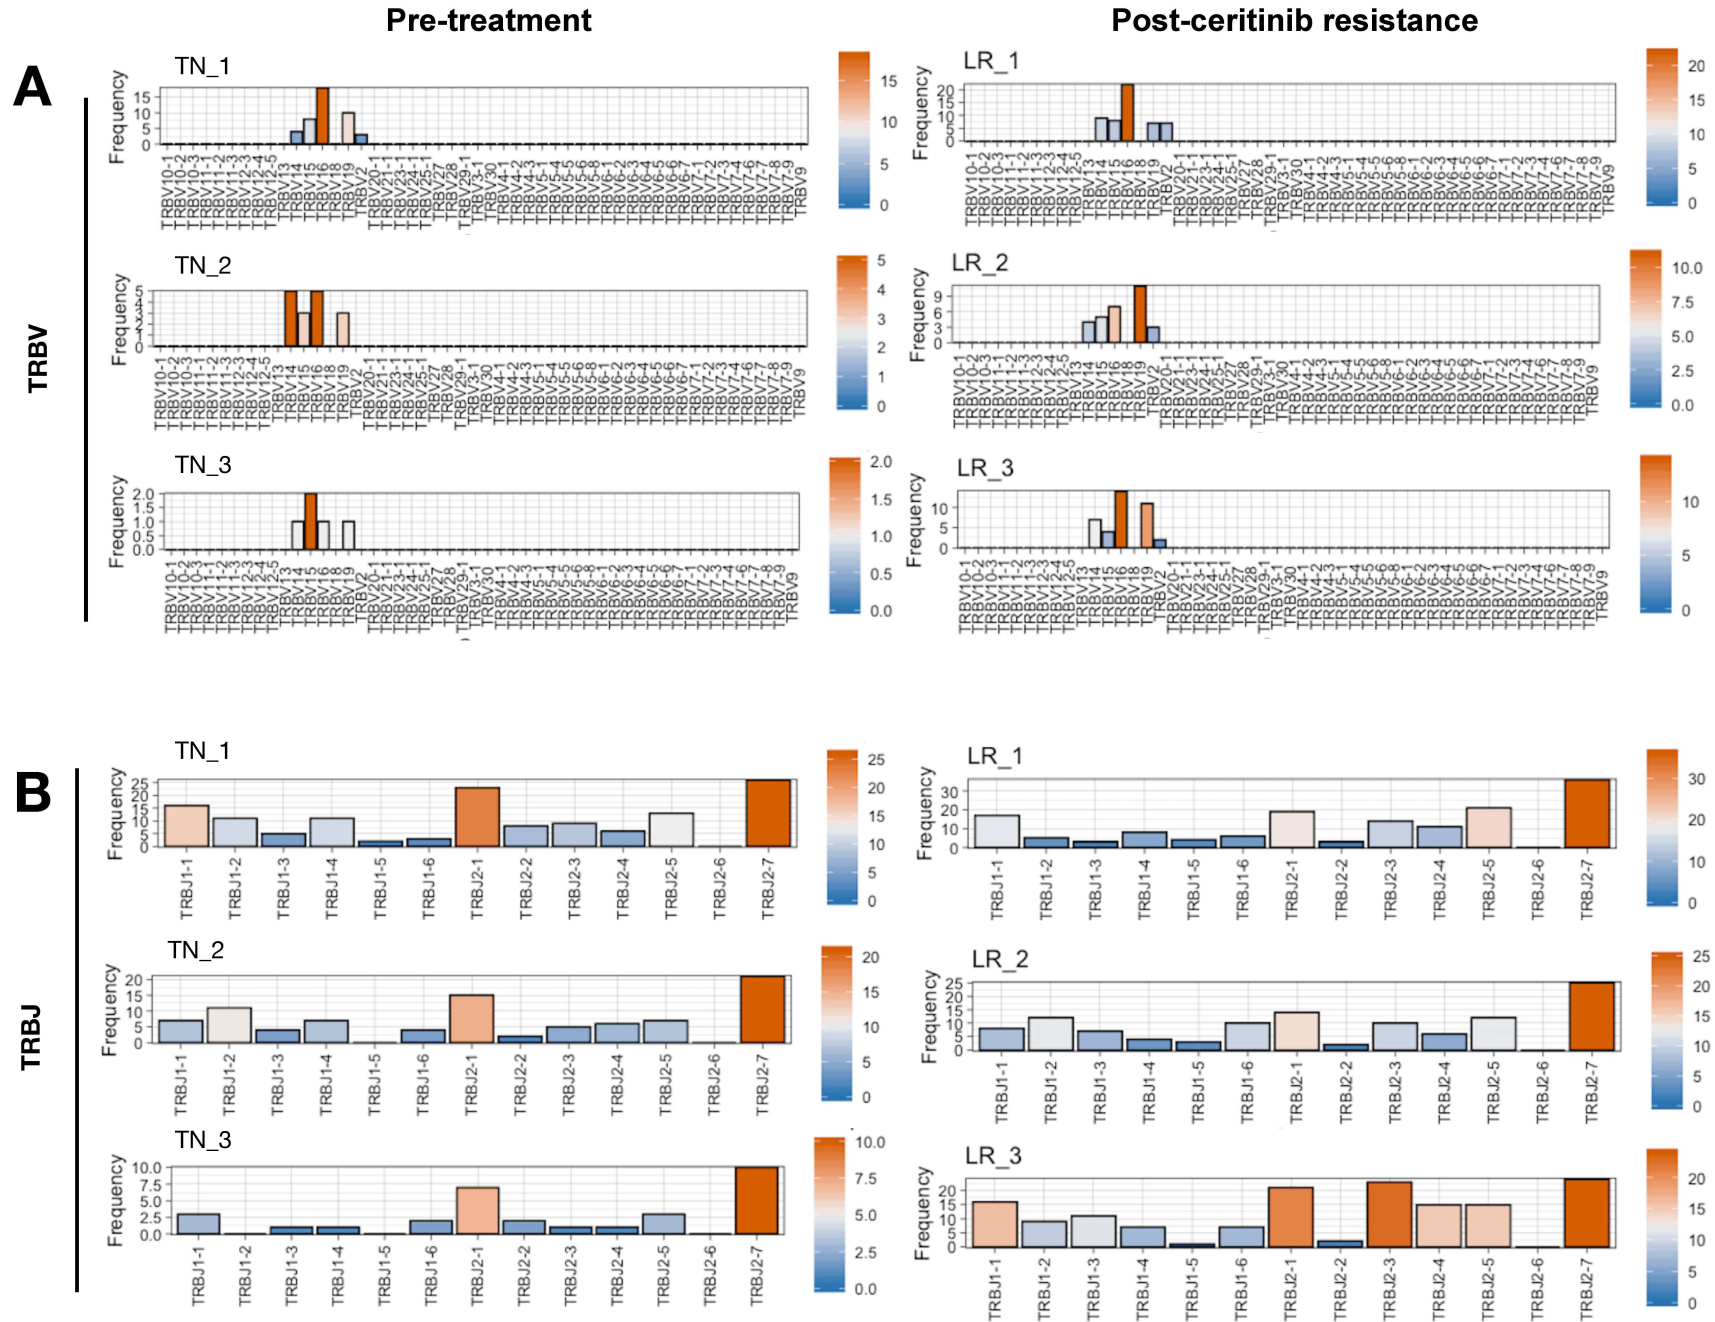

Supplement: jitc-2020-000970supp006.pdf [file jitc-2020-000970supp006.pdf]

## Supplementary Figure 7

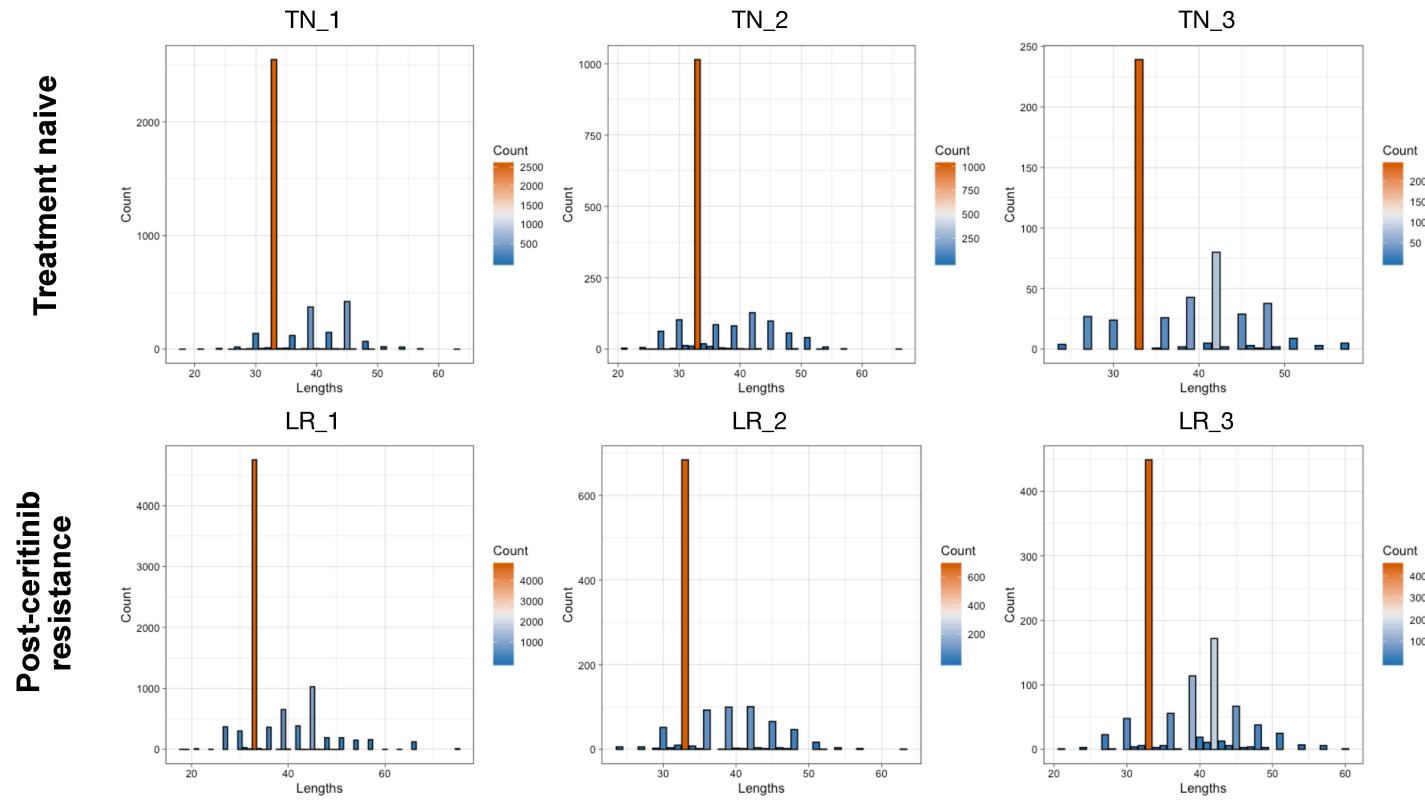

Supplement: jitc-2020-000970supp007.pdf [file jitc-2020-000970supp007.pdf]

## Supplementary Figure 8

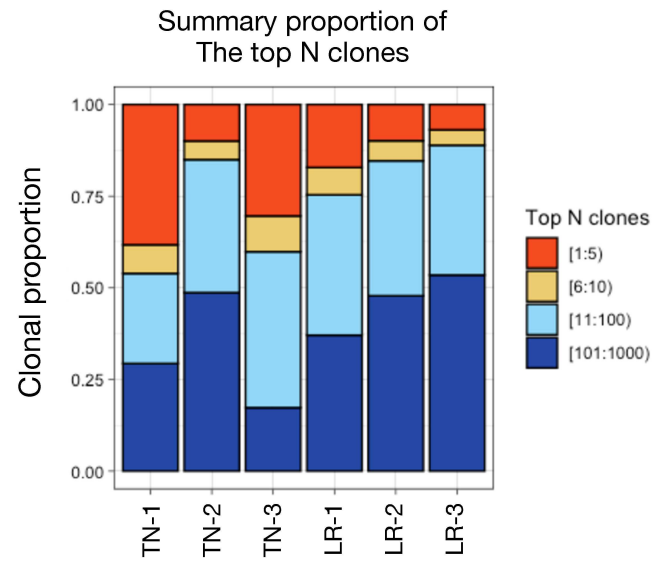

Supplement: jitc-2020-000970supp008.pdf [file jitc-2020-000970supp008.pdf]
